# Supplementary material
Source: HighWire-hosted journal article supplement (http://www.cmaj.ca/highwire/filestream/69107/field_highwire_adjunct_files/0/171374-image-1-at.pdf)
Supplement: 171374-image-1-at.pdf [file 171374-image-1-at.pdf]

**Appendix 1 (as supplied by the authors): Diseases and drugs that can cause skin discolouration**

| Diseases (causative agent; colour)                                                                                                                                                                                                                                                                                                 | Drugs                                                                                                                          |
|------------------------------------------------------------------------------------------------------------------------------------------------------------------------------------------------------------------------------------------------------------------------------------------------------------------------------------|--------------------------------------------------------------------------------------------------------------------------------|
| Hemochromatosis (iron; bronze)<br>Methemoglobinemia (ferric hemoglobin; blue)<br>Addison's disease (pro-opiomelanocortin; hyperpigmentation)<br>Wilson's disease (copper; yellow)<br>Ochronosis (homogentisic acid; blue/grey)<br>Whipple's disease (malabsorption; hyperpigmentation)<br>Carotenemia (carotenoids; orange/yellow) | <i>All cause blue/grey discolouration:</i><br>Amiodarone<br>Minocycline<br>Chlorpromazine<br>Chloroquine<br>Hydroxychloroquine |
